# Supplementary material
Source: MDPI journal article supplement (https://www.mdpi.com/2073-4441/12/9/2565)
Supplement: s1 [file s1]

## Supplementary

**Table S1.** Akaike information criterion for different fitting distributions.

| Distribution                     | Akaike Information Criterion (AIC) |
|----------------------------------|------------------------------------|
| <b>Region 1</b>                  |                                    |
| Lognormal (Maximum Likelihood)   | 151.969                            |
| Log-Pearson type 3 (Méthode SAM) | 152.521                            |
| Weibull (Maximum Likelihood)     | 158.323                            |
| Gumbel (Maximum Likelihood)      | 158.666                            |
| Normal (Maximum Likelihood)      | 174.524                            |
| <b>Region 2</b>                  |                                    |
| Lognormal (Maximum Likelihood)   | 162.878                            |
| Log-Pearson type 3 (Méthode SAM) | 164.840                            |
| Weibull (Maximum Likelihood)     | 166.798                            |
| Gumbel (Maximum Likelihood)      | 165.008                            |
| Normal (Maximum Likelihood)      | 179.205                            |

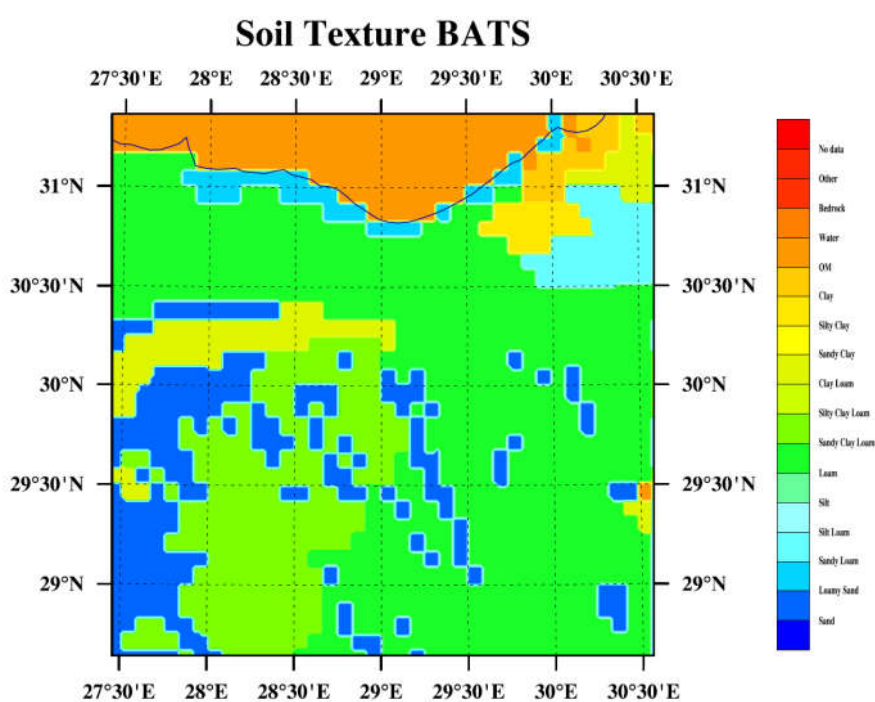

**Figure S1.** Soil texture in the study region.
